# Supplementary figures and images for: The zebrafish anatomy and stage ontologies: representing the anatomy and development of Danio rerio
Source: Springer Nature journal article supplement (doi:10.1186/2041-1480-5-12), 2014-01-01

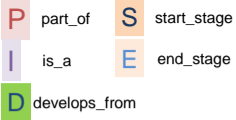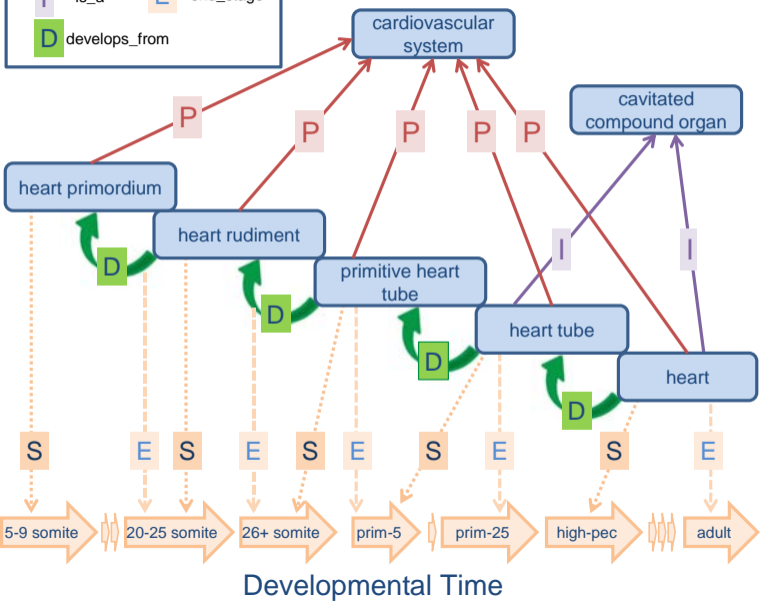

Supplement: 13326_2013_161_MOESM1_ESM.pdf [file 13326_2013_161_MOESM1_ESM.pdf]

A.

Neural Plate

Neural Keel

Neural Rod

B.

Neural rod

Neural keel

Neural plate

11 hpf

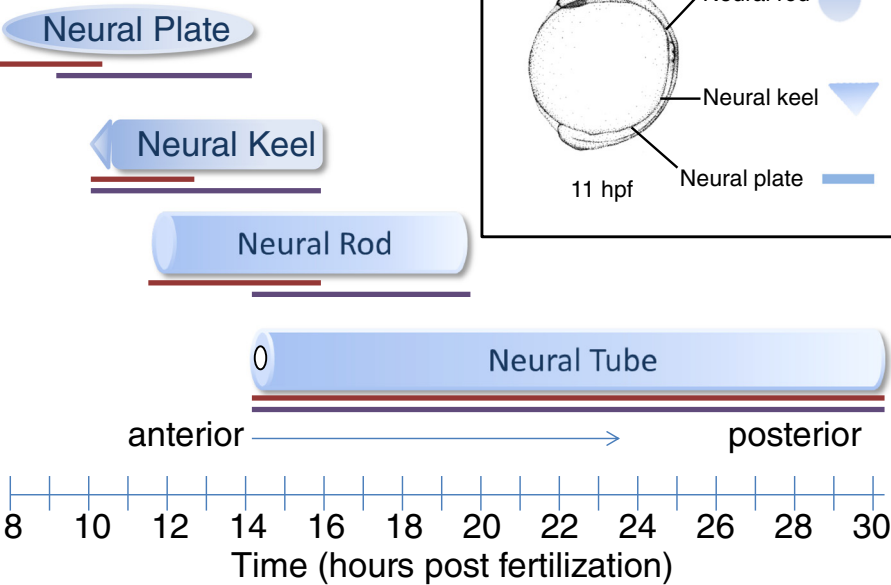

Supplement: 13326_2013_161_MOESM2_ESM.pdf [file 13326_2013_161_MOESM2_ESM.pdf]

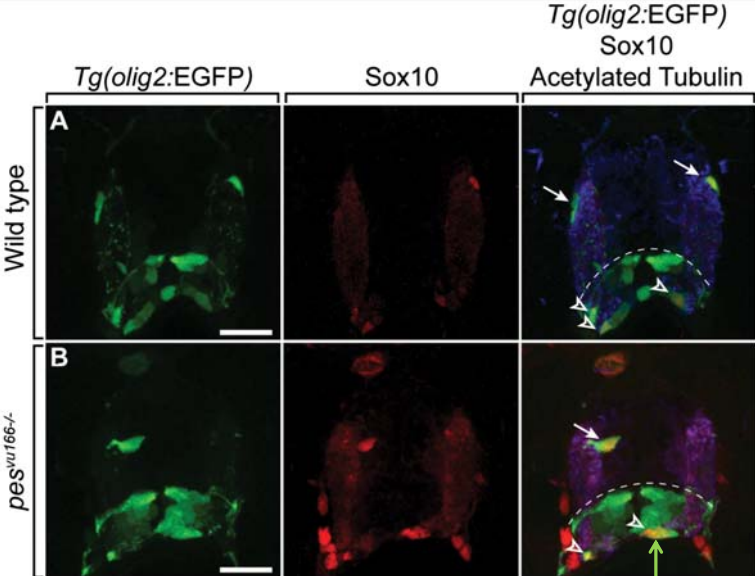

grey matter spinal cord has extra parts of type oligodendrocyte

ZFA:0001681

ZFA:0000075

PATO:0002002

ZFA:0009076

E

Q

E

Supplement: 13326_2013_161_MOESM3_ESM.pdf [file 13326_2013_161_MOESM3_ESM.pdf]

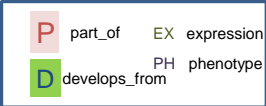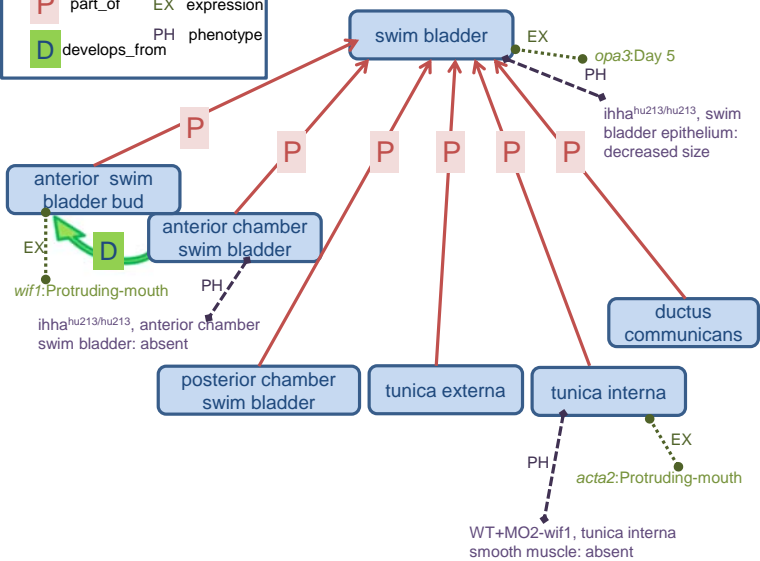

Supplement: 13326_2013_161_MOESM4_ESM.pdf [file 13326_2013_161_MOESM4_ESM.pdf]
